# Supplementary material for: A low rate of end-stage kidney disease in membranous nephropathy: A single centre study over 2 decades
Source: PLoS One. 2022 Oct 13;17(10):e0276053. doi: 10.1371/journal.pone.0276053 (PMC9560622; doi:10.1371/journal.pone.0276053)
Supplement: S1 Dataset — (XLSX) [file pone.0276053.s003.xlsx]

## Sheet: For Analysis
Study ID	Date of biopsy	DoB	Age at time of biopsy	Gender	Caucasian	Ethnicity	RIP	RIP date	Diabetes	Hypertension	CVD	Cardiovascular disease	Systolic bp at biopsy	Diastolic bp at biopsy	Systolic bp at 12 months	Diastolic bp at 12 months	Biopsy (native/ transplant)	Report available	Confirmed membranous?	Primary/ Secondary	Hb	Albumin	Corrected calcium	Phosphate	7	AntiPLA2R +/-	AntiPLA2R Value	eGFR 0	Creatinine 0	EGFR (CKD-EPI)	uPCR L/H	uPCR mild, mod, severe	Upcr 0	eGFR 12	Creatinine 12	uPCR 12	eGFR 60	creatinine 60	uPCR 60	Remission	Spontaneous remission	Remission after treatment	Complete remission	Remission (no, partial or complete)	Time of complete remission	Time to remission	Relapse	Time of first relapse	Time of second relapse
33	2003-04-30	1939-12-14	63.3778	0	1	0	0		0	0	0	0	148	68	130	5	0	1	1	1	119	19	2.47	1.09	132984				74	74.2536		1	785		75	506	78	69	12	1			1	2	2005-07-01	26	0
4	2000-08-17	1924-07-03	76.1222	0	1	0	1	2013-06-13	0	1	0	0	180	100			0	0	1	0	96	30	2.33	1.96	134916				108	62.046	0	0	316				49	98	1700	1	0	1		1			1	2007-11-01
5	2000-10-25	1935-02-12	65.7028	0	1	0	1	2018-01-28	0	0	0	0	130	70	127	82	0	0	1	0	153	26	2.27	1.16	135568				58	90		1	559		63	513	99	56	59	1	1	0		1			0
6	2000-11-22	1943-03-21	57.6694	1	1	0	0		0	1	0	0	210	110	131	80	0	0	1	0	141	20	2.4	1.01	135196				128	53.2725		1	598		176	717	41	159	6.5	1	1	0		1			1	2002-10-01
7	2000-12-06	1933-04-13	67.6472	1	1	0	1	2004-05-30	0	1	1	1	150	70	125	65	0	0	1	0	137	28	2.36	1.06	137431				100	66.9391	1	2	981		154	1115				1	0	1		1			0
9	2001-01-17	1935-04-10	65.7694	1	1	0	1	2011-05-23	0	1	0	0	120	80	142	80	0	0	1	0	104	24	2.27	1.05	486423				114	57.891		1	544		156	567	44	154	13.6	1	1	0		1			0
10	2001-01-31	1952-12-01	48.1667	0	1	0	0		0	0	0	0	132	80	150	91	0	0	1	0	144	17	2.32	1.1	138755				57	90	1	2	1170		65	73		67	27.4	1	0	1	1	2	2002-08-01	18	0
11	2001-04-11	1933-08-24	67.6306	0	1	0	0		0	0	0	0	122	90	127	81	0	1	1	0	133	21	2.45	1.3	1750816				70	77.0763	1	2	975		65	400	90	45	770	1	1	0	1	2	2003-09-01	28	1	2007-11-01
12	2001-06-13	1942-11-16	58.575	1	1	0	1	2016-08-22	0	1	0	0	150	100	152	96	0	1	1	0	122	26	2.56	1.3	134820				150	43.6981		1	723		203	95	45	143	13	1	0	1		1			1	2009-10-01
15	2001-08-08	2027-04-07	25.6639	0	1	0	1	2012-01-18	0	1	0	0	180	801	142	56	0	1	1	0	103	32	2.22	1.53	1749430				114	57.3953		1	775		110	387	37	125	352	1	1	0		1			1	2006-11-01
16	2001-09-07	1957-07-01	44.1833	1	1	0	0		0	0	0	0	140	90	139	94	0	1	1	0	167	28	2.39	1.19	466352				122	62.066	0	0	187		139	243	33	193	340	1	0	1		1			1	2006-03-01	2015-05-01
18	2001-10-03	1945-01-15	56.7167	1	1	0	1	2014-01-25	2	0	0	0	130	80	135	90	0	1	1	0	142	29	2.29	1.32	541218				103	69.7439		1	508		96	225	71	97	11	1	1	0	1	2	2004-11-01	36	0
21	2001-11-07	1947-08-27	54.1944	0	1	0	1	2014-02-27	0	0	1	1	130	80	100	70	0	1	1	0	139	36	2.47	1.42	1754785				66	90		1	350		65	108	90	55	18	1	1	0	1	2	2006-07-01	55	0
24	2002-02-13	1946-03-28	55.875	0	1	0	1	2009-06-11	0	1	0	0	145	70	140	85	0	1	1	0	136	34	2.3	1.84	257227				149	33.5835		1	403		114	516	19	228	243	1	1	0		1			1	2007-06-01
25	2002-05-08	1934-12-11	67.4083	1	1	0	1	2012-05-15	0	0	1	2	115	80	126	82	0	1	1	0	137	26	2.44	0.98	1795145				196	29.7215	1	2	1315		112	141	47	134	6	1	0	1		1			0
26	2002-05-15	1954-10-03	47.6167	1	1	0	0		0	1	0	0	149	101	116	85	0	1	1	0	130	39	2.43	1	456248				147	48.3617	1	2	1013		254	1146	21	276	72	1	0	1		1			1	2014-07-01
28	2002-07-04	1948-12-06	53.5778	0	1	0	0		0	1	0	0	150	95	164	100	0	1	1	0	125	25	2.42	1.39	1798300				82	70.2611	0	0	121		93	409	56	93	7	1	1	0	1	2	2006-11-01	51	0
31	2003-02-12	1935-06-15	67.6583	0	1	0	1	2003-11-27	0	1	1	2	110	70			0	1	1	0	134	17	2.56	1.52	1808245				96	52.601	1	2	1078							0	0	0	0	0			0
101	2009-04-29	1936-06-06	72.8972	1	1	0	1	2009-05-02	0	1	1	1	102	70			0	1	1		151	37	2.52	1.42	358051			90	76	86.2946	0	0	297							0			0	0			0
35	2003-10-03	2027-10-17	24.0389	1	1	0	1	2014-05-06	0	1	0	0	179	71	164	60	0	1	1	0	118	22	2.41	1.2	856917				112	79.2891		1	640		124	1500	44	138	270	1	1	0		1			1	2011-02-01
36	2003-10-08	1976-03-31	27.5222	1	1	0	0		0	1	1	2	129	83	142	92	0	1	1	0	128	42	2.36	1.04	1817601				92	90	0	0	211		92	157	73	107	18	1	1	0		1			0
37	2003-10-15	1959-12-05	43.8611	1	1	0	0		0	0	0	0	142	95	132	81	0	1	1	0	151	26	2.25	1.09	905098				120	63.4622		1	715		103	140				1	0	1		1			0
40	2004-01-28	1964-10-18	39.2778	1	1	0	1	2019-05-07	0	1	0	0	183	128	120	72	0	1	1	0	81	37	1.96	1.82	1835592				438	13.6989	0	0	348	8	696	165	58	122	19	1	0	1		1			1	2013-04-01
41	2004-01-28	1959-11-29	44.1639	0	1	0	0		0	1	0	0	112	80			0	1	1	0	134	32	2.53	1.18	1445042				93	64.4673
43	2004-06-09	2021-05-10	16.9194	1	1	0	1	2007-04-09	0	0	0	0	140	70	108	58	0	1	1	0	120	18	2.24	1.1	1843052				292	26.1692	1	2	1208	15	364	1604	10	469	500	0	0	0	0	0
44	2004-07-07	1930-03-09	74.3278	0	1	0	1	2014-09-10	0	1	0	0	122	65	143	78	0	1	1	0	116	26	2.42	1.49	1831393				86	57.3329		1	407	41	119	303	22	194	148	1	1	0		1			1	2008-08-01
45	2004-07-09	1967-07-18	36.975	0	1	0	0		0	0	0	0	140	50	129	87	0	1	1	0	130	24	2.31	0.88	1845745				76	86.5492	0	0	160	123	52	464	90	65	9	1	1	0	1	2	2009-05-01	57	0
46	2004-07-14	1943-06-15	61.0806	0	1	0	1	2012-06-19	0	1	1	3	130	60	145	80	0	1	1	0	152	32	2.35	1.38	600863				129	38.5411		1	539	23	199	966	33	142	185	1	0	1		1			1	2010-12-01
128	2011-08-12	1935-03-06	76.4333	0	1	0	0		0		0		140	75			0	1	1		99	40	2.13	1.31	513337			40	117	38.9361		1	387	39	119
47	2004-07-21	1962-04-10	42.2806	1	1	0	0		0	1	0	0	140	90	122	84	0	1	1	0	135	19	2.25	1.47	1846744				134	56.1562		1	639	33	202	809	55	127	18	1	1	0		1			1	2010-08-01
48	2004-07-21	1953-04-11	51.2778	1	1	0	0		0	0	0	0	116	70	112	56	0	1	1	0	152	20	2.28	0.78	319332				69	90		1	713	109	70	17	90	61	7	1	1	0	1	2	2005-10-01	14	0
49	2004-08-11	1942-04-28	62.2861	1	1	0	0		0	1	0	0	140	70	190	90	0	1	1	0	127	17	2.28	1.26	1244683				89	80.0245		1	664	81	88	254	51	127	102	1	0	1		1			1	2005-06-01	2011-08-01
50	2004-08-18	2023-01-19	18.4194	1	1	0	1	2007-03-23	0	0	0	0	140	80	128	60	0	1	1	0	103	28	2.14	1.33	1848772				205	39.7147		1	535	31	165	393				0	0	0	0	0
52	2004-11-10	1944-09-24	60.1278	0	1	0	0		2	1	0	0	130	50	125	68	0	1	1	0	85	28	2.35	1.67	1840675				218	20.575	1	2	1221	33	147	100	21	207	7	1	1	0		1			1	2017-10-01
53	2005-03-16	1968-07-09	36.6861	1	1	0	0		0	1	0	0	135	90	140	94	0	1	1	0	138	34	2.4	1.35	1853029			91	88	90	0	0	122	104	78	32	90	76	18	1	1	0	1	2	2008-08-01	40	0
54	2005-04-06	2023-03-31	17.9861	1	1	0	1	2009-11-19	0	0	1	1	110	60	128	62	0	1	1	0	115	14	2.13	0.89	1863522			78	87	90	0	0	343	37	160	1345	19	278	241	0	0	0	0	0
55	2005-05-25	1943-12-19	61.4333	1	1	0	1	2019-08-19	2	1	1	1	143	86	117	66	0	1	1	0	144	26	2.28	1.18	1834311			61	113	60.3205		1	720	63	107	108	40	155	11	1	0	1		1			1	2015-06-01
56	2005-06-22	1985-09-23	19.7472	0	0	1	0		0	0	0	0	103	56	106	64	0	1	1	0	148	30	2.48	1.51	1868659			89	77	90		1	701	90	53	31	90	57	6	1	1	0	1	2	2007-05-01	22	0
58	2005-07-06	1942-08-20	62.8778	0	1	0	1	2018-07-06	0	1	0	0	138	72	140	80	0	1	1	0	128	25	2.3	1.29	1869463			48	108	47.1775		1	775	28	162	476	20	222	358	0	0	0	0	0
59	2005-08-10	1946-03-28	59.3667	0	1	0	1	2009-06-11	2	1	0	0	121	53	128	69	0	1	1	0	94	35	2.18	1.48	257227			23	204	22.4137		1	590	16	266	317	16	260	185	1	1	0		1			0
60	2005-12-14	1930-05-07	75.6028	1	1	0	0		0	1	0	0	130	70	117	54	0	1	1	0	134	36	2.22	0.95	1872084			55	120	50.7785	0	0	208	38	159	11	43	142	39	1	1	0		1			0
62	2006-05-10	1941-05-07	65.0083	0	1	0	1	2015-12-25	0	1	0	0	159	66	166	71	0	1	1	0	119	34	1.86	1.61	1888627			11	474	7.77371	1	2	1258	8	656		6	628		0	0	0	0	0
63	2006-05-31	1945-02-15	61.2944	1	1	0	1	2015-03-03	0	1	0	0	152	88	157	80	0	1	1	0	136	22	2.32	1.09	1892554			82	73	90	1	2	1224	48	135	1952	7	717	1488	0	0	0	0	0
74	2007-06-20	1936-10-10	70.6944	0	1	0	0		0	1	0	0	152	54	145	84	0	1	1	1	121	36	2.37	1.25	868881			90	56	90		1	469	77	69	86	65	75	7	1			1	2	2010-02-01	31	0
86	2008-07-30	1945-11-17	62.7028	0	1	0	1	2010-08-30	0		0		110	70			0	1	1		134	35	2.21	0.97	881447			61	86	62.2113
65	2006-07-05	1952-10-08	53.7417	1	1	0	1	2015-09-02	0	0	0	0	118	72	99	65	0	1	1	0	113	26	2.39	1.28	1795543			90	52	90		1	407	90	56	69	39	162	72	1	1	0		1			0
32	2003-03-05	1950-09-23	52.45	0	1	0	1	2017-08-18	0	0	0	0	140	70	106	64	0	1	1	1	108	29	2.41	1.18	889484				91	62.4418	0	0	170		101	35	82	68	19	1			1	2	2005-03-01	23	0
66	2006-07-12	1938-04-14	68.2444	1	1	0	1	2020-04-19	0	1	0	0	140	68	123	54	0	1	1	0	115	44	2.28	1.27	1661357			43	145	42.5367	0	0	61	36	167	142	24	237	9	1	1	0		1			0
67	2006-08-09	1957-06-30	49.1083	1	1	0	0		0	1	0	0	142	88	133	60	0	1	1	0	165	26	2.27	1.28	1246236			82	89	87.786		1	450	88	84	82	90	71	478	1	1	0	1	2	2007-11-01	14	1	2012-06-01
70	2006-12-20	1936-11-29	70.0583	1	1	0	0		0	1	0	0	143	70	165	89	0	1	1	0	127	24	2.32	1.22	1781504			53	122	51.7506	1	2	857	52	124	1111	38	159	13	1	1	0		1			0
71	2007-01-03	1952-01-01	55.0056	1	1	0	1	2016-10-28	2	0	0	0	120	70	141	84	0	1	1	0	166	41	2.35	1.3	1904146			77	92	80.9146		1	459	82	87	421	54	123	160	1	1	0		1			0
72	2007-03-14	1957-07-01	49.7028	1	1	0	0		0	1	0	0	140	90	139	94	0	1	1	0	161	19	2.42	1.43	466352				124	58.5433	0	0	187.5		139	243	33	193	365	1	0	1		1			1	2006-03-01	2015-02-01
73	2007-05-02	1930-12-24	76.3556	1	1	0	1	2009-10-20	0	0	0	0	102	64	102	53	0	1	1	0	128	19	2.25	1.12	1921805			88	78	83.329	1	2	1000	73	91	742				0	0	0	0	0
75	2007-06-27	1948-11-27	58.5833	1	1	0	0		0	1	1	1	133	71	145	77	0	1	1	0	127	43	2.16	1	1907620			47	139	47.9101		1	500	43	148	196	41	154	35	1	1	0		1			0
76	2007-08-08	1951-05-07	56.2528	1	1	0	0		0	1	0	0	156	98	140	75	0	1	1	0	150	28	2.16	0.88	1925601			78	91	81.2757	1	2	960	86	84	217	55	120	178	1	0	1	1	2	2014-07-01	82	1	2011-06-01	2017-07-01
77	2007-09-12	1946-03-27	61.4583	1	1	0	0		0	0	0	0	114	73			0	1	1	0	145	30	2.28	1.32	1915677			90	68	90
81	2008-01-30	1938-12-08	69.1444	1	1	0	1	2008-08-18	0	1	1	1	105	53			0	1	1	0	96	21	2.2	0.9	1945344			33	181	32.328		1	525							0	0	0	0	0
83	2008-03-12	1949-01-14	59.1611	1	1	0	0		0		0		140	80			0	1	1	0	125	26	2.37	1.03	1949661			74	94	76.5698										1	0	0	1	2
85	2008-07-09	1946-04-12	62.2417	1	1	0	0		0	1	0	0	126	70	155	98	0	1	1	0	150	30	2.37	1.44	1963336			84	84	85.8455	1	2	2552	71	97	1417	30	148	31	1	1	0	1	2	2015-08-01	84	0
171	2014-04-09	1959-12-29	54.2778	1	1	0	0		0	0	0	0	134	67	144	69	0	1	1	1	108	32	2.5	1.61	1676082			47	140	48.9551		1	424	43	151	246	48	132	31	1				1			1	2020-02-01
87	2008-08-06	1950-07-19	58.0472	1	1	0	0		0	1	0	0	120	70	140	89	0	1	1	0	135	20	2.46	1.28	1955965			63	108	65.2466	1	2	1037	59	114	112	75	92	23	1	0	1	1	2	2010-11-01	26	0
88	2008-08-27	1934-07-23	74.0944	0	1	0	0		0	0	0	0	142	80	139	74	0	1	1	0	138	29	2.28	1.1	1967507			90	50	90				90	50	226	68	75	20	1	1	0	1	2	2011-11-01	38	0
90	2008-10-01	1946-01-29	62.6722	1	1	0	0		0	0	0	0	133	80	139	68	0	1	1	0	153	28	2.43	0.96	1966868			89	80	90		1	564	90	75	729	83	84	32	1	0	1	1	2	2013-11-01	61	1	2009-11-01	2017-10-01
91	2008-12-03	1944-08-22	64.2806	1	1	0	0		0	0	0	0	138	85	128	70	0	1	1	0	137	20	2.19	0.94	591665			76	91	76.8192		1	657	83	84	21	85	82	12	1	0	1	1	2	2010-07-01	18	0
17	2001-09-26	2021-12-05	20.1917	0	1	0	1	2010-06-10	0	0	0	0	100	60	130	80	0	1	1	1	110	25	2.33	0.97	1770736				109	62.968	0	0	323		120	24				1			1	2	2002-08-01	10	0
20	2001-11-07	1937-07-09	64.3278	1	1	0	1	2001-12-22	0	0	1	3	99	76			0	1	1	1	85	19	2.58	2.76	1774669				420	12.0864	1	2	2750							0			0	0			0
22	2001-12-28	1936-07-24	65.4278	1	1	0	1	2013-12-06	0	1	0	0	179	94	148	87	0	1	1	1	97	17	2.35	1.23	1781071				82	86.4271		1	531		139	366	35	172	568	1				1			0
92	2009-01-14	1974-05-07	34.6861	0	0	1	0		2	1	0	0	136	74	128	78	0	1	1	0	107	39	2.3	1.11	1958004			90	53	90		1	381	90	55	51	90	65	20	1	1	0	1	2	2010-08-01	18	0
93	2009-02-04	1940-01-03	69.0861	0	0	1	1	2009-08-06	2	0	0	0	118	60			0	1	1	0	135	21	2.22	1.14	1984528			72	73	84.0485	1	2	2868							0	0	0	0	0
95	2009-02-11	1975-04-01	33.8611	1	1	0	0		0	0	0	0	126	65	135	77	0	1	1	0	144	22	2.4	1.36	1849203			90	53	90	0	0	225	90	81	107	90	69	17	1	0	1	1	2	2013-10-01	55	1	2021-01-01
176	2014-06-30	1947-06-26	67.0111	1	0	2	1	2018-05-24	0	0	0	0	129	62	132	68	0	1	1	1	125	29	2.5	1.25	1797721	0	3	39	159	44.4851		1	667	35	172	40				1				1			1	2016-06-01
96	2009-03-11	1957-11-30	51.2806	1	1	0	0		0	1	0	0	156	88	150	80	0	1	1	0	146	23	2.09	1.14	1986294			90	78	90	1	2	1235	81	89	1065	75	95	7	1	0	1	1	2	2013-01-01	45	1	2015-01-01	2018-04-01
97	2009-04-01	1971-06-13	37.8	1	1	0	0		0	1	0	0	93	44	122	70	0	1	1	0	168	35	2.24	1.11	1984603			81	95	87.8352	0	0	87	74	102	18	70	105	26	1	1	0	1	2	2011-10-01	30	1	2012-08-01	2017-12-01
100	2009-04-29	1971-10-29	37.5	1	0	1	0		0	0	0	0	120	78	124	64	0	1	1	0	150	26	2.22	1.53	1934251			81	95	90		1	678	54	132	821				1	0	1		1
103	2009-06-17	1967-04-05	42.2	0	1	0	0		0	1	0	0	154	88	132	82	0	1	1	0	129	26	2.27	1.28	1974729			84	70	90	1	2	1185	60	93	545	76	75	10	1	0	1	1	2	2013-01-01	42	1	2017-07-01
104	2009-06-24	1950-12-01	58.5639	0	1	0	0		0	1	0	0	116	80	134	72	0	1	1	0	132	34	2.2	1.42	248043			56	93	58.2651	0	0	297	41	120	30	47	107	12	1	1	0	1	2	2014-04-01	57
57	2005-06-22	1978-06-28	26.9833	0	0	1	0		0	0	0	0	90	60	93	65	0	1	1	1	83	13	2.17	2.65	1822082			9	541	10.0299	1	2	1157	66	93	425	50	113	183	1				1			1	2016-03-01
105	2009-07-08	1952-06-01	57.1028	0	1	0	0		0	1	1	2	168	82	125	54	0	1	1	0	125	22	2.41	1.36	2000800			88	64	90		1	698	32	151	710	44	113	256	1	0	1		1			1	2014-12-01
39	2004-01-07	2027-07-04	23.4917	1	1	0	1	2019-06-20	0	1	1	3	155	80	148	77	0	1	1	1	116	37	2.35	1.45	1827731				134	64.0793	0	0	50	54	121	8	68	96	8	1			1	2	2006-11-01	33	0
108	2009-09-03	1934-04-20	75.3694	1	1	0	0		0	1	0	0					0	1	1	0					EXT3552589												18	304	102	0	0	0	0	0
109	2009-11-18	1976-03-09	33.6917	1	1	0	1	2020-04-18	0	1	0	0	162	95	172	98	0	1	1	0	90	32	2.15	1.59	334464			17	369	17.5281	1	2	830	13	460	613				0	0	0	0	0			0
110	2009-12-09	1973-06-06	36.5083	1	0	1	0		0	1	0	0	140	67	154	103	0	1	1	0	71	31	1.91	2.03	2016666			12	477	14.6027	0	0	290	7	758		68	129	11	1	0	1	1	2	2016-04-01	75	0
112	2010-02-17	1965-12-25	44.1444	0	0	1	0		0	0	1	2	119	76	107	60	0	1	1	0	129	23	2.15	1.06	2029658			90	38	90	1	2	1231	90	48	933	90	51	19	1	0	1	1	2	2012-02-01	23	1	2011-01-01
113	2010-02-24	1931-10-10	78.3722	1	1	0	1	2010-06-11	0	1	1	1	114	96			0	1	1	0	106	37	1.3	1.49	525056			18	303	16.2516	0	0	333							0	0	0	0	0
61	2005-12-14	2025-09-04	19.7222	0	1	0	1	2012-04-25	0	1	0	0	165	76	161	83	0	1	1	1	81	31	2.03	1.57	1842599			14	306	18.1369		1	682	34	134	267	16	253	667	1				1			1	2010-07-01
114	2010-03-03	1944-09-13	65.4722	0	1	0	0		0	1	0	0			146	60	0	1	1	0	108	40	2.21	1.11	195347			28	166	27.5498	0	0	289	19	228	328				0	0	0	0	0
117	2010-04-28	1988-03-20	22.1056	1	0	1	0		0	0	0	0	130	60	148	82	0	1	1	0	165	17	2.29	1.17	2038902			90	65	90		1	421	90	93	542	76	116	114	1	0	1		1			1	2016-11-01
118	2010-04-29	1961-10-02	48.575	1	1	0	0		0	1	0	0			137	79	0	1	1	0	145	27	2.31	0.95	EXT3116717			50	135	53.2465	1	2	947	42	158	1471	77	93	40	1	0	1	1	2	2020-03-01	118	0
119	2010-07-26	1951-04-11	59.2917	1	1	0	1	2011-05-06	0	0	0	0	101	77			0	1	1	0	146	13	2.2	1	2052350			83	86	85.1848	1	2	1408	90	71	2333				0	0	0	0	0
120	2010-08-18	1950-09-30	59.8833	1	1	0	1	2012-08-02	0	1	0	0	180	80	171	69	0	0	1	0	98	35	2.01	1.72	684732			13	405	13.0302	1	2	1204	6	758					0	0	0	0	0
121	2010-09-01	1939-09-07	70.9833	0	1	0	1	2017-01-31	0	1	0	0	123	72	139	62	0	1	1	0	127	36	2.2	1.07	2031766			70	75	69.2575	0	0	186	58	87	7	69	75	8	1	1	0	1	2	2011-05-01	8	0
122	2010-09-01	1942-10-27	67.8444	1	1	0	1	2021-03-03	0	0	1	1	125	70	138	72	0	1	1	0	107	48	2.12	1.18	576428			58	114	57.0533	0	0	21	58	111	13	73	92	8	1	1	0	1	2	2015-02-01	53	0
123	2010-09-22	1956-10-04	53.9667	1	1	0	1	2016-01-12	2	0	0	0	161	82	118	81	0	1	1	0	114	23	2.09	2.97	2053116			15	367	15.3015	1	2	1554	10	523	453	9	549		0	0	0	0	0
124	2010-10-13	1981-09-23	29.0556	0	0	1	0		0	0	0	0	115	65	114	69	0	1	1	0	122	18	2.35	1.61	2063718				25	90	1	2	829		46	23		39	16	1	0	1	1	2	2011-04-01	5	0
126	2011-04-27	1971-02-25	40.1722	1	1	0	0		0	0	0	0	130	78	125	74	0	1	1	0	128	17	2.1	1.27	359424			73	102	79.2687		1	531	75	99	234	90	77	329	1	0	1	1	2	2014-01-01	32	1	2016-01-01
127	2011-07-27	1945-02-26	66.4194	0	1	0	1	2015-11-16	0	0	0	0	151	81	127	60	0	1	1	0	84	27	2.05	1.25	2084037			19	229	18.548		1	607	5	681	1378	4	890	18	1	0	1		1			0
116	2010-03-31	1964-05-16	45.875	0	1	0	0		0	0	0	0	110	74	129	54	0	1	1	1	114	31	2.21	1.12	1886853			71	80	76.4151		1	566	60	95	32	60	87	33	1			1	2	2011-02-01	10	1	2017-03-01
129	2011-08-24	1946-07-06	65.1333	0	1	0	0		0	1	0	0	110	69	136	78	0	1	1	0	124	35	2.29	1.03	1966527			59	88	59.4817	0	0	15	55	92	6	63	78	4	1	1	0	1	2	2013-04-01	19	0
130	2011-08-31	1966-01-07	45.65	0	1	0	0		0	0	0	0	120	65	140	67	0	1	1	0	118	43	2.25	0.8	2099709			90	63	90	0	0	130	90	54	172	90	59	104	1	1	0	1	2	2017-06-01	69	1	2019-03-01
132	2012-01-18	1956-03-13	55.8472	1	1	0	1	2018-01-07	0	1	0	0	120	72		75	0	1	1	0	132	34	2.42	1.22	552251			21	281	20.8542	1	2	1859	16	343	1615	24	242	708	0	0	0	0	0
134	2012-04-16	1942-01-16	70.25	0	1	0	0		0	0	0	0	110	65	124	64	0	1	1	0	144	28	2.54	1.18	585700			90	53	90		1	429	58	88	50	58	83	11	1	0	1	1	2	2013-05-01	12
69	2006-11-22	1948-03-06	58.7111	1	1	0	0		0	1	0	0	140	70	137	71	0	1	1	1	134	17	2.19	1.13	1907896			90	76	90		1	571	70	99	36	90	63	273	1			1	2	2008-08-01	20	1	2013-10-01
136	2012-05-18	1946-09-21	65.6583	0	1	0	1	2019-05-15	0	0	0	0	140	80	133	73	0	1	1	0	95	18	2.26	1.22	2133598			36	134	35.6444	1	2	1037	30	156	516	32	142	6	1	1	0		1			0
138	2012-06-13	1955-11-16	56.575	1	1	0	0		0	1	0	0	140	90	174	84	0	1	1	0	145	28	2.6	1.41	2136689			90	76	90		1	402	57	118	120	76	88	244	1	1	0		1			1	2015-08-01	2019-10-01
139	2012-07-23	1949-04-11	63.2833	0	1	0	0		0	0	0	0	130	80	144	72	0	1	1	0	115	26	2.3	1.24	2145016			85	65	86.9149	1	2	1128	42	117	116	79	65	88	1	0	1	1	2	2013-12-01	16	1	2016-12-01	2019-04-01
141	2012-08-01	1975-07-01	37.0833	1	0	1	0		0	1	0	0	141	100	138	81	0	1	1	0	133	19	2.37	1.46	2145147			80	96	90	1	2	1807	76	100	126	7	797	216	1	0	1		1			1	2013-11-01
115	2010-03-17	1981-06-20	28.7417	0	0	1	0		0		0		131	80	112	78	0	1	1	1	142	23	2.25	1.14	1928936				19	90	1	2	1770		18	829		18	73	1				1			0
142	2012-09-10	1984-07-24	28.1278	0	1	0	0		0	0	0	0	134	84	136	86	0	1	1	0	126	30	2.53	1.28	1815163			90	59	90	0	0	306	85	73	59	90	65	6	1	0	1	1	2	2015-06-01	32	1	2019-11-01
79	2007-10-10	1958-07-07	49.2583	1	1	0	0		0	0	0	0	140	80	144	83	0	1	1	1	104	21	2.21	1.61	1936361			38	170	40.1021	1	2	811	90	78	14	90	65	5	1			1	2	2008-06-01	7	0
80	2007-12-12	2029-01-12	21.0833	1	1	0	1	2008-09-07	0	0	0	0	121	80			0	1	1	1	117	21	2.12	0.93	1942051			38	157	53.8136	1	2	1500	10	481	325				0			0	0
143	2012-09-10	1947-07-12	65.1611	0	1	0	0		0	1	0	0	146	84	136	78	0	1	1	0	121	24	2.54	1.07	2146895			73	73	74.5454		1	682	29	161	172	39	118	10	1	0	1		1			1	2020-02-01
144	2012-10-15	1933-08-19	79.1556	1	1	0	1	2013-09-30	2	1	0	0	140	60	119	65	0	1	1	0	139	31	2.56	1.18	2155957			54	117	51.0663	1	2	1338	54	116	1556				0	0	0	0	0			0
149	2012-12-03	1941-06-02	71.5028	1	1	0	1	2014-11-17	0		0		150	70			0	1	1	1	122	28	2.42	1.05	1951262			31	193	29.4225
145	2012-10-17	1957-07-30	55.2139	1	1	0	1	2018-05-21	2	1	0	0	135	83	161	96	0	1	1	0	131	32	2.62	1.13	430519			48	137	49.9247	1	2	1143	15	366	882	13	402	658	0	0	0	0	0
146	2012-10-17	1939-06-03	73.3722	1	0	1	1	2015-09-10	2	1	0	0	104	79	138	70	0	1	1	0	143	21	2.59	0.98	628513			30	166	40.3819	1	2	893	41	150	806				0	0	0	0	0
147	2012-11-07	1988-12-02	23.9306	0	0	1	0		0	1	0	0	130	72	151	79	0	1	1	0	118	31	2.38	1.28	2129939			90	59	90		1	619	90	68	149	63	92	471	0	0	0	0	0
148	2012-11-19	1965-08-27	47.2278	0	1	0	0		0	0	0	0	153	90	127	71	0	1	1	0	124	26	2.39	1.13	338259	1	18	18	46	90	1	2	1115	88	66	41	90	53	5	1	0	1	1	2	2013-12-01	12	0
150	2012-12-10	1954-11-27	58.0361	1	1	0	0		0	0	0	0	140	66			0	1	1	0	130	24	2.53	1.09	2178428				81	90		2	1105				77	87	5	1	0	1	1	2	2016-09-01	44	0
151	2013-01-09	1959-09-10	53.3306	1	1	0	0		0	1	0	0	136	79	146	69	0	1	1	0	94	41	2.38	1.23	503698			16	360	15.7321	0	0	91	18	324	112	6	797	381	1	0	1		1			1	2018-01-01
152	2013-01-21	1951-07-22	61.4972	0	1	0	0		0	0	0	0	130	90	134	74	0	1	1	0	139	22	2.53	1.01	2178420			90	58	90	1	2	968	58	89	37	87	60	5	1	0	1	1	2	2014-03-01	13	0
89	2008-08-27	1933-01-31	75.575	1	1	0	1	2008-10-14	0		0		140	80			0	1	1		132	19	2.39	1.98	1967859			29	199	27.5538	1	2	831							0			0	0
153	2013-01-30	1936-03-08	76.8944	0	1	0	1	2013-11-22	0	1	1	2	114	66			0	1	1	0	121	20	2.52	1.27	868079			61	83	58.7783		1	757	53	186	571				0	0	0	0	0
154	2013-03-15	1986-10-17	26.4111	1	0	1	0		0	0	0	0	126	62	155	71	0	1	1	0	108	14	2.51	0.92	2195810			41	178	51.6187	1	2	1180	31	228	39	50	143	150	1	0	1		1			0
155	2013-05-08	1960-11-04	52.5111	0	1	0	0		0	1	0	0	117	73	119	98	0	1	1	0	157	20	2.64	1.26	2197761			73	76	77.6008	1	2	1119	64	85	90	72	72	9	1	0	1	1	2	2013-10-01	4	1	2014-09-01
156	2013-05-15	1941-10-06	71.6083	0	1	0	0		0	0	0	0	125	75	140	94	0	1	1	0	128	30	2.48	1.31	2200397	1	92	90	53	90	0	0	110	90	60	596	79	47	77	1	1	0		1			1	2018-02-01
98	2009-04-08	1940-02-18	69.1389	1	1	0	0		0		0		127	77				0			129	19	2.24	1.25	1990844			90	68	90
99	2009-04-22	1971-11-18	37.4278	1	0	2	1	2019-07-07	0	1	0	0	169	90	141	67	0	1	1	1	104	19	2.23	1.31	1993295			45	157	55.6049	1	2	1117	46	153	682	17	344	219	0			0	0
157	2013-06-12	1977-04-19	36.1472	1	1	0	0		0	0	0	0	130	85	130	75	0	1	1	0	152	22	2.38	1.05	2202516	1	158	90	71	90	1	2	901	90	75	105	90	68	64	1	0	1		1			1	2015-01-01	2015-10-01
107	2009-08-21	1933-05-01	76.3056	1	1	0	1	2011-05-04	0	0	0	0					0	1	1	1	104	40	2.25	2.59	2008149			8	603	7.17566		1	425	12	421					0			0	0			0
158	2013-08-28	1956-06-14	57.2056	1	0	1	0		0	1	0	0	160	84	138	78	0	1	1	0	151	27	2.51	0.61	2202836	1	4	84	85	90	1	2	1172	73	96	34	67	98	27	1	1	0	1	2	2014-07-01	10	1	2017-07-01
111	2010-01-13	1952-03-31	57.7861	1	1	0	1	2012-07-19	0	0	0	0	136	80	159	93	0	1	1	1	147	27	2.41	1.22	2022420			29	213	28.7576	1	2	1385	7	688	1015				0			0	0
159	2013-09-16	1947-01-15	66.6694	0	1	0	0		0	1	0	0	129	70	147	77	0	1	1	0	121	31	2.61	1.22	1265725			78	69	78.9602	1	2	809	90	57	138	72	70	6	1	1	0	1	2	2016-02-01	28	0
160	2013-10-02	1965-10-23	47.9417	1	1	0	0		0	0	0	0	122	60	137	73	0	1	1	0	153	33	2.47	1.16	2224696	0	5	90	71	90	1	2	1657	90	81	1146	90	73	23	1	0	1	1	2	2017-06-01	43	0
161	2013-10-09	1935-06-11	78.3278	0	1	0	1	2014-01-29	0	0	0	0	120	80			0	1	1	0	111	30	2.54	0.98	2139473			29	153	27.7791		1	627							0	0	0	0	0
163	2013-12-09	1980-09-04	33.2639	1	1	0	0		0	1	0	0	173	85	148	68	0	1	1	0	131	22	2.49	1.13	2235371			90	83	90		1	611	90	65	168	76	96	353	1	0	1		1			1	2015-02-01	2017-03-01
164	2013-12-09	1946-12-29	66.9444	1	1	0	1	2017-05-18	0	0	0	0	115	75	123	68	0	1	1	0	111	33	2.3	1.09	2233125			49	131	48.5337	0	0	122							0	0	0	0	0
165	2014-01-06	1958-07-08	55.4944	1	1	0	0		0	0	0	0	109	77	114	70	0	1	1	0	158	28	2.43	1.16	2215860			90	60	90	0	0	102	90	65	25	90	69	9	1	1	0	1	2	2014-07-01	5	0
166	2014-01-27	1935-05-22	78.6806	1	1	0	1	2019-03-12	0	1	1	2	162	83	160	79	0	1	1	0	97	24	2.07	1.03	2026317			12	435	10.4734	1	2	1000	15	340	647	9	548	273	0	0	0	0	0
167	2014-02-19	1932-05-29	81.7222	1	1	0	0		0	0	0	0	120	70	104	53	0	1	1	0	122	21	2.29	0.9	1745702	1	274	90	61	88.7778		1	772	83	82	189	90	54	112	1	0	1		1			1	2015-12-01
131	2011-09-14	1965-04-17	46.4083	1	1	0	0		0	0	0	0	120	82			0	1	1	1	163	30	2.4	1.27	2063714			69	105	73.2583		1	388	80	92	170	69	99	6	1			1	2	2015-02-01	40	0
168	2014-03-03	1943-06-06	70.7417	1	1	0	0		2	1	0	0	150	80	161	69	0	1	1	0	175	28	2.36	0.92	2222817	0	10	82	84	80.8697	1	2	929	44	142	20	26	183	17	1	0	1		1			1	2017-11-01
125	2010-12-08	1957-12-24	52.9556	1	1	0	1	2014-11-21	0	0	1	2	102	68	116	77	0	1	1	1	128	28	2.48	1.36	2070549			51	132	53.0551		1	368	42	154	462	12	448	1348	0			0	0
169	2014-03-24	1952-06-10	61.7889	1	1	0	0		0	1	1	4	148	79	186	82	0	1	1	0	120	27	2.42	1.46	2249093			55	120	55.9529		1	587	48	136	340	55	116	347	1	0	1		1			1	2019-08-01
170	2014-04-02	1932-02-18	82.1222	0	1	0	1	2016-01-30	0	0	1	1, 3	109	56	159	90	0	1	1	0	105	22	2.32	1.25	307102			76	78	61.079		1	390	72	49	282				1	0	1		1			0
172	2014-04-23	1936-10-28	77.4861	0	1	0	0		0	1	1	2	153	80	126	73	0	1	1	0	111	25	2.39	1.22	2255380	0		71	73	68.3629		1	513	64	79	48	55	86	5	1	1	0	1	2	2015-08-01	15	1	2020-09-01
133	2012-02-29	1943-09-26	68.425	1	1	0	1	2012-03-15	0		0		110	59			0	1	1		96	11	2.43	2.1	2127908			20	280	19.1731	1	2	4732							0			0	0
173	2014-05-21	1971-09-09	42.7	0	0	1	0		0	0	0	0	117	70	107	76	0	1	1	0	123	29	2.5	1.29	1845255			90	47	90		1	750	90	42	17	90	55	7	1	1	0	1	2	2014-10-01	4	0
135	2012-04-18	1939-06-29	72.8028	1	1	0	1	2015-06-25	0		0		120	70			0	1	1		154	31			2133281			37	163	35.7616
174	2014-05-28	1950-05-15	64.0361	1	1	0	0		0	0	0	0	149	70	153	77	0	1	1	0	135	23	2.43	0.93	2265570			90	66	90		1	795	90	66	361	49	127	172	1	0	1		1			1	2015-12-01	2020-02-01
175	2014-06-11	1947-10-16	66.6528	1	1	0	0		0	0	1	1	110	70	122	60	0	1	1	0	135	27	2.52	0.95	478960	1		84	83	84.44	0	0	325	89	79	232	79	83	9	1	1	0	1	2	2016-04-01	21	0
177	2014-07-16	1948-07-29	65.9639	1	1	0	1	2017-01-05	0	0	0	0	109	63	104	68	0	1	1	0	166	15	2.36	1.33	2273103	0		90	58	90	1	2	1115	90	56	140				1	0	1	1	2	2015-09-01	13	0
137	2012-06-11	1973-04-10	39.1694	1	1	0	0		2	0	0	0	105	50			0	1	1	1	146	38	2.22	1.09	2140554			90	51	90							90	63	12	1			1	2	2018-06-01	71	0
140	2012-07-23	1943-05-24	69.1639	1	1	0	0		0	1	1	2	140	80			0	1	1	1	138	31	2.34	0.85	2144649			90	74	89.5639							88	75	29	1			1	2	2017-11-01	63	0
178	2014-07-30	1939-04-14	75.2944	1	1	0	0		0	1	0	0	137	83	182	77	0	1	1	0	111	38	2.48	1.12	2250424			53	120	50.8886		1	711	59	109	134				1	1	0		1			1	2015-04-01	2016-07-01
179	2014-09-29	1951-06-12	63.2972	1	1	0	0		0	0	0	0	123	80	102	73	0	1	1	0	135	17	2.34	0.92	2289460	0		77	90	78.392	1	2	946	65	104	88	78	85	13	1	0	1	1	2	2016-05-01	19	0
181	2014-11-17	1965-04-19	49.5778	1	1	0	0		0	1	0	0	143	85	158	84	0	1	1	0	109	15	2.36	1.3	2297820			75	96	79.8435		1	654	88	84	101	83	84	29	1	0	1	1	2	2017-07-01	31	0
182	2014-11-26	1968-08-21	46.2639	0	0	1	0		0	1	0	0	156	83	143	85	0	1	1	0	127	32	2.32	1.25	2287592			90	58	90	0	0	313	90	47	19	90	55	40	1	1	0	1	2	2016-09-01	21	1	2018-06-01
183	2015-04-15	1969-11-19	45.4056	1	0	1	0		2	0	0	0	160	98	139	92	0	1	1	0	135	19	2.44	1.22	2310802	1	21	90	60	90	1	2	1744	90	60	1294	90	73	547	0	0	0	0	0
184	2015-04-22	1982-11-15	32.4361	0	1	0	0		0	0	0	0	118	82	132	85	0	1	1	0	134	40	2.5	0.94	1336238	0		90	45	90		0	100	90	66	73	90	53	23	1	1	0	1	2	2020-10-01	65
185	2015-06-03	1937-05-15	78.05	1	1	0	1	2018-11-27	0	1	0	0	148	59	151	49	0	1	1	0	126	32	2.56	1.49	1963962			52	122	48.9254	0	0	324	40	148	255	39	151	415	1	0	1		1			1	2018-03-01
186	2015-06-08	1974-07-16	40.8944	1	1	0	0		0	1	0	0	175	102	168	85	0	1	1	0	125	24	2.48	1.53	2330980			20	313	20.3321		1	432	26	241	125	9	596	322	0	0	0	0	0
187	2015-06-10	1936-09-22	78.7167	0	1	0	1	2019-02-13	2	1	0	0	148	90	143	57	0	1	1	0	110	40	2.4	1.24	2329652	1	36	63	80	60.6719	1	2	900	52	90	328	12	312	714	1	0	1		1			1	2017-04-01
188	2015-06-17	1960-07-29	54.8833	1	1	0	0		0	0	1	1	156	74	119	63	0	1	1	0	119	23	2.39	1.32	2331673	1	294	90	72	90	1	2	967	72	94	49	73	92	10	1	0	1	1	2	2017-09-01	26	0
189	2015-11-16	1993-04-05	22.6139	0	1	0	0		0	0	0	0	127	75	121	64	0	1	1	0	136	39	2.42	1.08	2361243	0		90	46	90	0	0	8	90	38	7	90	53	6	1	1	0	1	2	2016-04-01	4	0
190	2001-09-07	1957-07-01	44.1833	1	1	0	0		0	1	0	0	140	90	139	94	0	1	1	0					466352							0	187.5
191	2015-12-07	1963-08-25	52.2833	1	1	0	0		0	0	0	0	139	65	144	90	0	1	1	0	153	28	2.32	0.69	2355288	1	17	79	91	83.5738		1	513	69	99	293	111	59	52	1	1	0		1			0
192	2016-01-27	1978-09-03	37.4	0	1	0	0		0	0	0	0	88	57	119	77	0	1	1	0	107	28	2.43	1.34	2373090	1	15	27	185	29.4347	1	2	1286	90	61	35				1	0	1		1
193	2016-04-11	1975-07-01	40.7778	1	0	1	0		0	1	0	0	141	100	138	81	0	1	1	0	133	19	2.37	1.46	2145147			80	96	90	1	2	1807	76	100	126	7	797	901	1	0	1		1			1	2013-12-01
194	2016-04-18	1960-04-12	56.0167	1	1	0	0		0	0	1	2	130	76	129	53	0	1	1	0	134	20	2.36	1.39	2377055	1	61	90	64	90	1	2	888	90	61	51	90	70	6	1	0	1	1	2	2018-02-01	21	0
195	2016-05-25	1941-08-09	74.7944	1	1	0	0		0	1	0	0	152	87	142	97	0	1	1	0	153	24	2.51	1.11	2388936	1	536	90	80	83.3758		1	545	81	81	39	70	91	11	1	0	1	1	2	2016-12-01	6	0
196	2016-07-11	1974-07-16	41.9861	1	1	0	0		0	1	0	0	175	102	168	85	0	1	1	0	110	28	2.52	1.31	2330980			13	436	13.5153		1	400	25	251	153	9	596	322	0	0	0	0	0
197	2016-07-13	1947-05-15	69.1611	0	1	0	1	2019-08-02	0	0	0	0	117	67	123	56	0	1	1	0	138	17	2.41	1.03	884037	0		69	47	90		1	548	64	77	500				0	0	0	0	0
199	2016-10-05	1954-07-28	62.1861	1	1	0	0		0	0	0	0	127	61	101	62	0	1	1	0	119	27	2.39	1.04	2418126	1	37	84	81	89.7392	1	2	866	70	94	18	79	84	232	1	0	1	1	2	2017-06-01	7	1	2020-12-01
200	2016-10-17	1947-07-30	69.2139	1	1	0	0		0	1	0	0	148	72	139	57	0	1	1	0	127	37	2.41	1.05	1823864	0		69	94	71.3492		1	462	63	102	35	51	121	16	1	1	0	1	2	2018-03-01	16	0
201	2017-01-09	1951-03-09	65.8333	0	1	0	0		0	0	1	1	147	73	109	63	0	1	1	0	112	27	2.55	1.69	2435162	0		37	126	38.3512	1	2	1294	18	240	401	14	295		0	0	0	0	0
202	2017-01-30	1950-02-01	66.9972	1	0	1	0		0	0	0	0	126	69	123	64	0	1	1	0	130	28	2.43	1.44	2429784	1	201	90	75	90	1	2	1372	77	86	161	48	128	532	1	0	1	1	2	2017-10-01	8	1	2018-02-01	2019-12-01
180	2014-10-08	1947-10-14	66.9833	1	1	0	0		2	1	0	0	150	73	116	54	0	1	1	1	123	21	2.4	0.96	2278352	0	3	34	177	33.7214	1	2	1843	32	188	253	33	175	344	1				1			1	2017-10-01
203	2017-04-06	1969-01-17	48.2194	1	1	0	0		0	0	0	0	125	78	134	83	0	1	1	0	122	27	2.37	1.43	926638	1	510	58	117	63.4618		1	512	71	98	101	65	104	10	1	0	1	1	2	2020-10-01	41	0
204	2017-04-13	1939-04-12	78.0028	1	1	0	1	2018-05-27	0	1	1	2	160	67	132	76	0	1	1	0	139	29	2.33	2.08	2185827	0		21	255	20.0715	1	2	1160	11	450	369				0	0	0	0	0
205	2017-04-20	1945-07-23	71.7417	1	1	0	0		0	1	0	0	155	76	170	90	0	1	1	0	150	33	2.34	0.7	2433660	0		90	71	89.4656		1	489	68	94	9	67	95	11	1	1	0	1	2	2017-07-01	2	0
206	2017-05-08	1953-09-14	63.65	1	1	0	0		0	1	0	0	146	70	151	70	0	1	1	0	160	35	2.32	0.96	2444976	0	7	67	101	68.0221	1	2	1080	56	115	84	56	113	12	1	1	0	1	2	2018-07-01	13	0
207	2017-05-15	1935-09-14	81.6694	1	1	0	0		0	1	0	0	133	83	161	95	0	1	1	0	142	32	2.53	1.12	1924851	0		58	106	56.5336		1	538	53	115	838	42	141	421	0	0	0	0	0
208	2017-05-22	1954-01-18	63.3444	0	1	0	0		0	1	0	0	150	80	119	79	0	1	1	0	126	33	2.53	1.32	2441787	1	30	90	55	90		1	356	89	59	327	62	80	57	1	1	0		1			0
209	2017-07-10	1964-07-03	53.0194	1	1	0	0		0	0	0	0	160	94	135	85	0	1	1	0	120	31	2.32	1.89	970785	1	46	55	119	60.1131		1	714	58	114	508	62	107	31	1	0	1	1	2	2020-12-01	40	0
211	2017-09-04	1973-06-09	44.2361	0	1	0	0		0	0	0	0	123	82	110	61	0	1	1	0	166	28	2.54	1.18	936154	0		73	75	83.573	1	2	1206	74	74	910	62	85		0	0	0	0	0
212	2017-09-18	1949-02-07	68.6139	1	1	0	0		2	1	1	1, 2	153	71	142	56	0	1	1	0	130	39	2.27	0.98	232443	0		70	93	72.583	1	2	1190	70	93	396	46	133	182	1	1	0		1			1	2020-10-01
213	2017-09-25	1959-12-18	57.7694	1	1	0	0		0	0	0	0	140	86	145	83	0	1	1	0	149	36	2.52	0.85	2481861	0	9	90	70	90	0	0	328	90	72	32	90	71	9	1	1	0	1	2	2018-05-01	7	0
215	2017-10-02	1956-06-19	61.2861	1	1	0	1	2018-10-30	0	1	1	2, 4	125	83	178	98	0	1	1	0	120	31	2.49	1.07	898479	0		68	97	72.6238	1	2	1500	38	158	1211				0	0	0	0	0
216	2017-11-20	1965-10-31	52.0556	1	1	0	0		0	0	0	0	150	80			0	1	1	0	124	28	2.37	1.29	2473874	1	179	47	141	49.2993		1	672
217	2017-11-27	1981-06-20	36.4361	1	1	0	0		2	0	0	0	141	93	126	91	0	1	1	0	156	28	2.39	0.83	2483337	1	64	90	64	90	1	2	952	90	96	561	71	102	569	0	0	0	0	0
198	2016-10-03	1943-07-13	73.2222	1	1	0	0		0	1	0	0	154	90	149	71	0	1	1	1	119	28	2.38	1.2	2413988	1	565	53	117	53.2397		1	574	52	118	42	35	165	15	1				1			0
218	2018-02-01	1944-09-24	73.3528	0	1	0	0		2	1	0	0	138	83	157	87	0	1	1	0	112	38	2.55	1.18	1840675	1	131	26	168	25.6914	1	2	1383	18	227	483				0	0	0	0	0
219	2018-03-05	1972-11-23	45.2833	1	1	0	0		2	1	0	0	127	57	122	86	0	1	1	0	131	27	2.55	0.89	300030	1	438	90	72	90		1	367	90	70	159	90	72	38	1	0	1		1			0
220	2018-04-30	1966-03-04	52.1556	1	1	0	0		0	0	0	0	138	100	151	107	0	1	1	0	166	30	2.51	1.32	2491756	1	123	88	80	90		1	632	90	78	220	77	89	49	1	0	1		1			0
221	2018-06-28	1936-10-30	81.6611	0	1	0	0		0	0	0	0	160	68	144	66	0	1	1	0	136	42	2.38	1.32	867585	0		76	65	76.3886		1	361	74	66	18	80	62		1	1	0	1	2	2019-11-01	16	0
222	2018-07-19	1948-02-24	70.4028	1	1	0	0		0	0	0	0	131	76	139	81	0	1	1	0	149	34	2.53	0.94	2527683	0		58	109	59.1596		1	395	54	115	519	49	126	200	1	0	1		1			0
223	2018-08-02	1978-11-27	39.6806	1	0	2	0		0	1	1	3	127	80	145	97	0	1	1	0	161	39	2.41	1.04	945333	0		76	96	90		1	353	66	107	91	71	100	18	1	1	0	1	2	2020-01-01	16	0
210	2017-07-13	1936-09-09	80.8444	1	1	0	0		2	1	0	0	119	72	103	69	0	1	1	1	135	31	2.34	1.12	2449246	0		65	97	63.3011		1	680	77	83	133				1				1			0
224	2018-10-01	1969-03-11	49.5556	1	1	0	0		0	0	0	0	135	88	155	94	0	1	1	0	162	17	2.49	0.81	2072933	1	1339	87	67	90		1	690	90	61	112	90	77	48	1	0	1		1			1	2019-03-01	2020-06-01
214	2017-10-02	1987-06-01	30.3361	0	1	0	0		0	0	0	0	105	75	113	69	0	1	1	1	143	28	2.38	1.68	2479829	0		90	55	90		1	690	90	51	11	71	82	9	1			1	2	2018-06-01	7	0
225	2018-11-19	1954-04-01	64.6333	1	1	0	0		2	1	0	0	130	78	168	98	0	1	1	0	134	38	2.38	1.26	612209	0		45	139	45.9166		1	514	49	127	780	31	190	838	0	0	0	0	0
226	2018-12-13	1943-05-23	75.5556	1	1	0	0		0	1	0	0	153	82	145	82	0	1	1	0	135	39	2.44	1.06	2538618	1	40	75	86	75.988	0	0	308	68	74	140	59	105	260	1	0	1		1			1	2020-08-01
227	2018-12-31	1953-04-04	65.7417	0	1	0	0		0	0	1	3	119	76	131	91	0	1	1	0	101	26	2.39	1.96	2558996	1	508	20	213	20.3421	1	2	2169	49	98	110	55	88	22	1	0	1	1	2	2020-08-01	19	0
228	2019-04-04	1967-04-15	51.9694	1	1	0	0		0	1	0	0	132	95	139	85	0	1	1	0	147	29	2.5	0.9	1798378	1	130	90	63	90	1	2	1160	72	95	226	68	100	267	1	0	1		1			0
229	2019-04-15	1964-11-02	54.4528	0	1	0	0		0	1	0	0	132	85			0	1	1	0	130	18	2.44	0.85	2564785			84	64	90		1	774
230	2019-04-18	1996-02-17	23.1694	0	0	1	0		0	0	0	0	116	77	140	90	0	1	1	0	122	25	2.51	1.39	2592554	1	156	90	34	90	1	2	914	49	>90	547	90	55	618	0	0	0	0	0
231	2019-05-20	1960-03-17	59.175	1	1	0	0		0	0	0	0	147	98	155	90	0	1	1	0	140	27	2.45	1.03	586602	1	164	55	118	58.1596		1	524	62	105	36	57	114	16	1	0	1	1	2	2021-01-01	19	0
232	2019-05-23	1950-12-18	68.4306	0	1	0	0		0	0	0	0	139	94	139	89	0	1	1	0	140	35	2.51	1.21	2039404	1	32	69	73	72.8528		1	763	56	87	113	56	87	44	1	1	0		1			0
233	2019-05-23	1947-12-06	71.4639	1	1	0	0		0	1	0	0	132	72	145	73	0	1	1	0	141	26	2.44	1.37	349507	1	122	68	95	69.3376		1	595	81	81	160	72	90	38	1	0	1		1			0
234	2019-06-06	1992-07-24	26.8667	1	1	0	0		0	0	0	0	111	62	115	70	0	1	1	0	132	36	2.3	1.26	2059854	0		90	59	90		1	365	90	64	26				1	1	0	1	2	2019-12-01	5	0
235	2019-06-17	1956-12-20	62.4917	0	1	0	0		0	1	0	0	155	105	135	85	0	1	1	0	108	28	2.4	1.49	2599101	1	129	60	84	64.1015	1	2	829	52	94	506	38	123	18	1	0	1		1			1	2020-05-01
238	2019-12-12	1969-05-02	50.6111	0	1	0	0		0	0	0	0	149	68	125	86	0	1	1	1	75	21	2.36	1.65	2629126	0		53	96	59.2926		1	431	65	81	27				1			1	2	2020-06-01	5	0
106	2009-07-09	1954-07-28	54.9472	1	1	0	0		0	0	0	0					0	0	1	1					EXT02381856																						1	2015-09-01
236	2019-06-24	1942-08-21	76.8417	0	1	0	0		0	1	0	0	154	90	133	76	0	1	1	0	127	24	2.48	1.42	2569793	1	145		45	90	0	0	308		35	1056		48	33	1	1	0		1			1	2020-03-01
237	2019-09-02	1955-11-01	63.8361	0	1	0	0		0	1	0	0	163	95	104	59	0	1	1	0	130	20	2.46	1.2	2606311	1	218	71	72	76.5077	1	2	824	69	74	17	69	73	14	1	0	1	1	2	2020-09-01	11	0
8	2000-12-28	1951-06-19	49.525	0	0	1	1	2019-11-16	0	0	0	0	130	80	130	75	0	0	1	1	133	31	2.17	0.9	ZP0012006				72	90	0	0	15		68	13		57	9	1			1	2	2012-12-01	143	0
51	2004-10-07	1938-03-17	66.5556	0	0	1	1	2010-07-24	0	1	0	0			179	101	0	0	1	1					ZP0417175				120	46.9113				37	128	600	27	167	21	1				1			0
		t
[truncated: 20 more columns]
